# Supplementary material for: Continuous 24-h Photoplethysmogram Monitoring Enables Detection of Atrial Fibrillation
Source: Frontiers journal article supplement (doi:10.3389/fphys.2021.778775), 2022-01-04
Supplement: Data_Sheet_2.PDF [file Data_Sheet_2.PDF]

## Supplementary Appendix 2 – PPG quality algorithm validation

Performance of PPG quality algorithm was evaluated with subpopulation of 50 subjects (AF N = 25, SR N = 25). ECG and PPG measurements of randomly selected patients were synchronized. Positive predictive value (PPV) of pulse detection were evaluated for all 1-minute segments, by using method presented in ANSI/AAMI EC57: 2012 clause 4.3.<sup>[1]</sup> 1-minute segments with >95% pulse detection PPV were deemed as high-quality samples and PPV ≤ 95 as low-quality samples, which were used as a “correct” reference values in assessing performance of PPG quality algorithm. Performance measures of PPG quality algorithm are presented in Supplementary Appendix 2 Table 1.

**Supplementary Appendix 2 Table 1.** Performance measures of PPG quality algorithm

|             | Number of samples | Sensitivity (%) | PPV (%) | Specificity (%) | NPV (%) |
|-------------|-------------------|-----------------|---------|-----------------|---------|
| All samples | 61679             | 89.0            | 92.7    | 91.4            | 90.8    |
| SR          | 30945             | 89.7            | 91.4    | 92.4            | 90.9    |
| AF          | 30734             | 88.3            | 91.4    | 93.2            | 90.7    |

Abbreviations: AF, atrial fibrillation; PPV, positive predictive value; NPV, negative predictive value.

## Supplementary Appendix 2 References

1. American National Standards Institute (2012). Testing And Reporting Performance Results Of Cardiac Rhythm And ST Segment Measurement Algorithms (ANSI/AAMI EC57:2012).
